# **Influence of the ecological opportunity of interaction on the structure of host-parasite networks**

Elvira D’Bastiani<sup>1\*</sup>, Karla Magalhães Campião<sup>2</sup>, Walter Antonio Boeger<sup>2</sup>, Sabrina Borges Lino

Araújo<sup>3</sup>

<sup>1</sup>Programa de Pós-Graduação em Ecologia e Conservação, Laboratório de Interações Biológicas - Setor de Ciências Biológicas, Caixa Postal 19031, CEP 81531-990, Curitiba, PR, Brasil.

<sup>2</sup>Departamento de Zoologia, Laboratório de Interações Biológicas - Setor de Ciências Biológicas, Caixa Postal 19031, CEP 81531-990, Curitiba, PR, Brasil.

<sup>3</sup>Departamento de Física, Laboratório de Interações Biológicas - Setor de Ciências Biológicas, Caixa Postal 19031, CEP 81531-990, Curitiba, PR, Brasil.

\*Corresponding author: Elvira D’Bastiani, Programa de Pós-Graduação em Ecologia e Conservação, Laboratório de Interações Biológicas - Setor de Ciências Biológicas, Universidade Federal do Paraná, Curitiba, Paraná 81531-980, Brazil. e-mail: [elviradebastianii@gmail.com](mailto:elviradebastianii@gmail.com); Telephone: +55 41 996532860.

30 **Abstract**

31 Despite the great interest to quantify the structure of ecological networks, the influence of morphological,  
32 ecological and evolutionary characteristics of the species still remains poorly understood. One of the  
33 challenging issues in ecology is how the interaction opportunity influences and provides changes to the  
34 associations between species, and which effects these changes have on ecological systems. To explore  
35 topological patterns in host-parasite networks, we sampled endoparasites-anurans interactions in South  
36 America in order to determine whether the effect of the ecological opportunity affects our understanding  
37 of the topological structure of the interaction networks. To identify the effect of the ecological opportunity  
38 for interaction, we investigated interactions in environments with and without flood pulse, where  
39 presence would promote higher ecological opportunity of interaction. Moreover, we created three  
40 theoretical models with filters to test the influence of the ecological opportunity for interaction: random,  
41 phylogeny and host body size. We then calculated commonly used binary network metrics (connectance,  
42 nestedness and modularity) for the networks generated by the theoretical models. We demonstrated that  
43 the interaction ecological opportunity changes the structure of host-parasite networks, and was  
44 influenced mainly by phylogeny and body size of the host. Our results indicate that environments that  
45 offer greater opportunities for interaction between species present networks with the most  
46 connectance/nestedness and less modularity. Networks in environments that do not have such  
47 opportunities for interaction depict the opposite pattern. Our results indicate that the ecological  
48 opportunity of interaction is reflected in an increase in interaction associations between species and  
49 affect/change the organization of these interactive assemblages. From an epidemiological point of view,  
50 changes in the composition of parasitic species are associated with risks of invasions and emerging  
51 diseases. In part, emerging diseases are the result of processes such as those occurring during the flood  
52 pulse, in which climate change, travel, and global trade create opportunities for new species  
53 associations. Our results provide insight into the dynamics of incorporating a new resource, considering  
54 an evolutionary factor responsible for these changes in species composition.

55 **Keywords:** Body size · Community assembly · Dispersal limitation · Endoparasite-anuran · Phylogeny

56

57

58

## 59 **Introduction**

60 Understanding factors that determine the establishment and persistence of interactions  
61 between species is fundamental to comprehend the factors that structure ecological  
62 communities [40]. Host-parasite interactions are influenced by characteristics of the  
63 hosts and associated parasites. For hosts, characteristics such as body size and  
64 structure, diet, age, and immune system are considered significant [43,48,23], but these  
65 and others are the resources that dictate the feasibility of the association with specific  
66 parasite species [7, 15]. Important characteristics on the parasite species include life  
67 cycle complexity [23], virulence, transmissibility, strategies to evade immune responses  
68 [65], host species recognition, and trophic requirements [45], among others. Therefore,  
69 the effects of these features directly influence the structure of interaction networks.

70 Hence, intrinsic factors/characteristics of each association determine the potential  
71 for an interaction to occur, and compose what Combes [21], Araujo et al. [7], and [15]  
72 designate as compatibility. However, the effective establishment of a compatible  
73 interaction depends on the encounter opportunity [7,15,73]. This effectiveness is often  
74 the result of ecological adaptation [38], which postulates that key characteristics shared  
75 with previous host species are necessary for a successful infection [33,12,74]. The  
76 ecological adaptation is the process that allows the parasite organism to successfully  
77 colonize a new host without the need of evolutionary novelties [3,50].

78 The support to this new vision of parasitism lies in the fact that the  
79 macroevolutionary process, commonly named host-switching, has proven to be much  
80 more common in nature than previously thought [74,15]. Many human pathogens  
81 originate through host-switching, including HIV and malaria [76], and host-shifts are also  
82 the predominant cause of new host-parasite associations for rabies viruses in bats [70],  
83 malaria in birds [28], and among other associated diseases [14, 50, 55,59].

84 The ecological opportunity for interaction is significantly influenced by the  
85 environment [15]. Cyclical changes in expansion and isolation, for instance, generate  
86 Taxon Pulse processes [27, see also 34]. Taking this into account, Taxon Pulse  
87 processes can lead to increase or limitation of opportunities for interaction between  
88 hosts and parasites and, consequently, alter the structure of the community. The flood  
89 pulse, for example, is considered a key factor in the ecological functioning and the  
90 patterns of lowland communities [63,71]. These flood pulses [41] tend to reduce spatial  
91 variability and biological as well as environmental factors [9,71]. According to this  
92 hypothesis, during low water periods, floodplains are more isolated from each other and  
93 disconnected from the main channel of the river, creating isolated habitats, often with  
94 distinct environmental characteristics. On the other hand, subsequent increases in water  
95 levels represent an expansion event for aquatic and semiaquatic organisms. We  
96 postulate that this pattern of isolation/expansion between neighboring aquatic habitats  
97 (flood plain/flood pulse system) provides the ecological opportunity for encounter  
98 between endoparasites and anurans species, which may result in new interactions  
99 through ecological adjustment. By contrast, continuously isolated habitats provide more  
100 limited opportunities for encounter between hosts and parasitic species. In fact, some  
101 studies have reported greater similarity between species in the composition of different  
102 aquatic habitats during floods than during non-flood periods [5,9,63,72]. We also expect  
103 that the structure of communities subjected to cycles/pulses of isolation and expansion  
104 will present greater sharing and connectivity of endoparasites between hosts. Limited  
105 ecological opportunity in continuously isolated habitats should exhibit less parasite  
106 sharing and lower endoparasites connectivity among the anuran hosts, changing the  
107 structure of the network.

108 In this study, we tested whether this structure is influenced by phylogeny and body  
109 size hosts and whether the periodic ecological opportunity of encounters influences the  
110 structure of an anuran-endoparasite (endoparasite-anuran) interaction network in  
111 environments with and without annual flood pulses. We used a database of anuran-  
112 endoparasite interactions to infer how the network structure of each environment can be  
113 explained by randomly sampled networks obtained under different theoretical models  
114 with filters: neutral, host phylogeny, and host body size. If phylogeny or body size  
115 imposes restrictions on species interactions, we expect to find compartments in the  
116 random networks. On the other hand, if there are no restrictions, networks would show  
117 nested patterns with interaction indirectly reflecting the abundance of species. We  
118 conclude that, among the filters analyzed, host body size and phylogeny greatly explain  
119 the observed host-endoparasite networks. However, similar networks of environments  
120 with cyclic flood pulse were not well explained by these filters, strongly suggesting that  
121 the increased opportunities provided by the environment can intensify encounters and  
122 promote and increase connectivity in the host-parasite local network.

123

## 124 **Materials and Methods**

125 To test for differences in ecological opportunity, we selected four parasite-host  
126 interaction networks compiled from literature data and described them using network  
127 metrics (nestedness, connectance, and modularity). Next, we sought to know if it was  
128 possible to explain their structure based on the phylogenetic characteristics and body  
129 size of the hosts analyzed. For this, we created theoretical models with filters (see  
130 below) and then compared the structure of the four networks analyzed with the networks  
131 generated by theoretical models to test the effect of the process of interaction of  
132 opportunity in different environments. See the methods for details.

133

#### 134 **Host-parasite database**

135 We created a database with reports on the association of interactions between anurans  
136 and helminth parasites (endoparasite) from South America. All possible combinations  
137 (e.g. amphibians, endoparasites, helminth, anura) were used to search for anuran-  
138 endoparasite (endoparasites belonging to the phylum Acanthocephala, Nematoda, and  
139 Platyhelminthes, associated with amphibians of the order Anura) empirical studies  
140 conducted in South America from 01-Jan-1925 to 20-Dez-2017. These data were  
141 collected using online database platforms such as BioOne, Isi JSTOR, PubMed,  
142 SciELO, Scopus, and Web of Science. We have updated the amphibian's nomenclature  
143 according to the American Museum of Natural History [29]. *Leptodactylus latrans*  
144 interaction reports were not included in the analyses due to many changes in  
145 nomenclature. From here on we will call "host" for anuran and "parasite" for helminth  
146 parasites. We then generated a binary matrix with these real interactions in which the  
147 rows represented host species and the columns represented parasite species. This  
148 matrix was used as an interaction database to generate random networks through the  
149 theoretical models (filters). We collected 157 peer-reviewed articles and recorded 686  
150 real interactions between 215 species of parasites and 170 species of hosts (Appendix  
151 S1).

152

#### 153 **Selection of analyzed environments**

154 During the bibliographical review, four (4) community studies of host-parasite  
155 interactions (observed networks) were selected: (i) two studies of flood pulse  
156 environments (with annual cycles of water expansion and retraction), which could  
157 promote environmental homogenization and higher ecological opportunity for host-

158 switching: Pantanal - Campião et al. [18], and Chaco - González and Inés [30] flood  
159 pulse. The Pantanal network was composed by 11 hosts and 16 parasites (Appendix  
160 S2) while the Chaco, by 35 and 46, respectively (Appendix S2) [18,30]. (ii) Two studies  
161 from environments without flood pulse, which potentially promote less ecological  
162 opportunity for host-switching: Atlantic Rainforest Graça et. [31], and Amazonian forest  
163 Bursey et al. [16]. The Atlantic Rainforest network was composed by 11 host and 15  
164 parasites (Appendix S2), while the Amazonian forest by 43 and 16 respectively  
165 (Appendix S2) [31,16].

166

### 167 **Theoretical models**

168 To answer our questions, we chose to test the effect of random, phylogeny, and host  
169 body size to see the changing structure (ecological opportunity) of host-parasite  
170 networks in different environments. We chose phylogeny because it was revealed as a  
171 potential driver of parasitic diversity. Host species vary in their evolutionary time of  
172 exposure for parasites acquisition and sharing, therefore, suffering variable co-  
173 evolutionary constraints [32] which would influence the interactions and the structure of  
174 their networks' interaction. We also chose the host body size as it was a good predictor  
175 of the diversity of parasite species [17,42,53]. Large hosts can provide more space and  
176 resources, and possibly a greater breadth of niches for parasites. Moreover, larger hosts  
177 live longer and represent fewer ephemeral habitats than small species and are therefore  
178 also more exposed to parasites [61].

179 Three theoretical models with filters were created (random, phylogeny and body  
180 size of hosts models - Appendix S3), to test the influence of the ecological opportunity  
181 on the structure of host-parasite networks. Each model is characterized as a specific  
182 filter that randomly selects hosts and their parasites from the interaction database that

183 resulted in random networks. Unlike what is commonly used to analyze the structure of  
184 networks, our random networks considered only real interactions extracted from the  
185 interaction database (collected from the literature). Our models have generated random  
186 networks using real interactions and may give a more accurate answer about the  
187 topology of the interaction network than other simpler null models commonly used that  
188 consider only random interaction simulations, or that weigh only by the interaction ratio  
189 of the species network for example. Given this approach the following theoretical models  
190 were proposed: i. Neutral Model: No other filter besides the number of host species,  
191 being the same number in each observed network (11 hosts for Pantanal, 35 for Chaco,  
192 11 for Atlantic Rainforest and 43 for Amazonian forest respectively - Appendix S3 - Filter  
193 i); ii. Phylogeny Model: This model randomly samples from the database the same  
194 number of host species belonging to the same families in the same proportion of the  
195 original network, as reported in each observed network (Appendix S3 - Filter ii; Appendix  
196 S4 - families of the species by observed network); iii. Body Size Model: This model  
197 randomly samples from the database the same number of hosts species with the same  
198 body size distribution (considering a standard error of  $\pm 5\%$ ) as reported for hosts species  
199 in each observed network (Appendix S3 - Filter iii; Appendix S4 - body size of the  
200 species by observed network).

201 For each one of the four environments analyzed, the random networks maintained  
202 the number of host species of each observed network (Pantanal, Chaco, Atlantic  
203 Rainforest and Amazonian forest). In this way, the number of hosts remained constant  
204 (according to each environment), while the number of parasites varied between the  
205 random networks, according to the association in the database of recorded interaction.

206 We sampled 1.000 random networks for each model in each environment (random  
207 networks per model in Appendix S5). Each random sample was always included in the



208 interactions database after each randomization, so that a species could be included in  
209 more than one random network. We then compared how well the filters explain the  
210 observed network (the comparison methods are detailed below). Unfortunately, it was  
211 not possible to impose on a similar real filter the ecological opportunity to evaluate the  
212 effect of interaction opportunity because we have no observation that refers to such a  
213 factor. Aquatic and terrestrial systems have different physical and chemical conditions,  
214 which seem to influence the biology and diversity of the organisms living in each of these  
215 habitats [75], that is why we assumed phylogenetic conservatism of the organisms living  
216 in each of these analyzed habitats. Given their aspects, we hypothesized that flood  
217 pulse environments are not as well explained by the filters (neutral, phylogeny, and host  
218 body size) as the other environments. We postulate that in environments without flood  
219 pulse the phylogenetic conservatism could be higher, that is, as it is an environment with  
220 few opportunities the species maintain their interactions over evolutionary time. If this is  
221 true, we expect that the networks will be better described by the phylogeny and body  
222 size models that are supposed to have their most preserved interactions. This is  
223 something we would not observe in the cyclic flood pulse because there is a constant  
224 change that interferes with this conservatism.

225

## 226 **Data analysis**

### 227 **Network Metrics**

228 We used the metrics nestedness, connectance, and modularity to characterize the  
229 structure of all networks. The nestedness was calculated using the metric proposed by  
230 Almeida-Neto et al. [6], to evaluate the presence of interactions that belong to subsets of  
231 other interactions. Therefore, a high nestedness value indicates a hierarchy of  
232 interactions, in which species that interact with fewer partners (have a lower degree)

233 interact with a subset of partners from species that have more partners (a higher degree)  
234 [8]. Connectance is the proportion of interactions performed for all possible interactions  
235 between species in a community [52]. Modularity was calculated using the method  
236 proposed by Dormann and Strauß [24], to describe the presence of network groupings,  
237 where species interact more with species within their group than with species belonging  
238 to other groups [58]. These groups are commonly called network modules, and to  
239 calculate these network metrics, we used the commands implemented in the “bipartite”  
240 package [25] in R [22].

241

#### 242 **Standardization for network metrics**

243 To allow comparison between networks of different sizes, we standardized the network  
244 metrics using a simple linear regression between metrics and number of parasites. This  
245 standardization is necessary because although the host species richness was constant  
246 in the different samples, the size of the whole network differed in each sample due to  
247 variation in parasite richness. See below:

$$248 \quad \bar{Y} = Y - \alpha * par + \beta,$$

249 where  $\bar{Y}$  is the value of the standardized metric (equivalent to the regression  
250 residue),  $Y$  is the value of the non-standardized metric,  $par$  is the number of parasites,  
251 and  $\alpha$  and  $\beta$  are the slope and the linear coefficient of the regression, respectively.

252

#### 253 **Comparison of the network structure**

254 From here onwards we call “observed network” any of the four observed networks for  
255 tested environments, and “random network” any network generated by filters. We  
256 identify which model best explains each observed network as well as which network is  
257 best described by the models. To compare networks, we first calculated the distance ( $D$ )

258 for each metric, from each random network of each theoretical model to the observed  
259 network in units of standard deviation:

260 
$$D = (\bar{Y}_{obs} - \bar{Y}_{rand}) / \sigma_{rand}$$

261 where  $\bar{Y}_{obs}$  is the standardized value of the observed network,  $\bar{Y}_{rand}$  is the  
262 normalized value of the random network metric, and  $\sigma_{rand}$  the standard deviation of 1.000  
263 values of  $\bar{Y}_{rand}$ . Subsequently, for a given metric and observed network, a unidirectional  
264 analysis of variance (ANOVA) was applied to evaluate whether there was a difference  
265 between these groups. Tukey's test [79] was used to determine the occurrence of  
266 differences between treatments. After measuring the difference, the distance averages  
267 between the real networks and each random network of each model was compared to  
268 verify which theoretical model best described the observed networks. When the metric  
269 and the observed network were fixed, we compared which model best explained the  
270 observed network. When the metrics and model were fixed, we compared which  
271 observed network was best explained by the models. All statistical analyses were  
272 performed using the "stats" package in the R software [22]. For all tests, we assumed  
273 the significance of  $p < 0.05$ .

274

## 275 **Results**

### 276 **Structure of host-parasite interaction networks**

277 Some of the random networks presented a range from smaller to greater number of  
278 parasite species than the observed networks (Fig. 1, 2, 3 - black bars, upper x axis -  
279 frequency of the number of parasites), except for the Amazon, whose smallest random  
280 network had at least twice more parasites than the observed network. Thus, by  
281 correcting the effect of network size, the theoretical models could not reach a network as  
282 small as that analyzed in the Amazon due to low parasitic richness analyzed in this

283 environment (Fig. 1, Fig. 2 and Fig. 3 - j to l). Despite our attempt to control the effect of  
284 network size by a standardization method, we were unable to ensure that the ratio of the  
285 metric and the number of parasites maintained the same linear tendency for such low  
286 numbers of parasites for Amazon. Therefore, the Amazonian simulations were removed  
287 from subsequent analysis.

288 The nestedness increases with the number of parasites in the network for the  
289 remaining three environments (Fig. 1, Appendix S6). Connectance and modularity were  
290 negatively correlated with the number of parasites in most simulated models (Fig. 2 and  
291 3, Appendix S6), except for the connectance in simulated neutral models for the  
292 Pantanal ( $R^2 = 0.01$ ,  $p = 0.98$ ) and Atlantic Rainforest, which were not correlated ( $R^2 =$   
293  $0.002$ ,  $p = 0.15$ ).

294  
295 **Fig. 1** Nestedness values according to the number of parasite species before standardization. The black  
296 dots indicate the nestedness value of random networks for three theoretical models. Grey dot - Pantanal  
297 (a, b, c), green dot - Chaco (d, e, f), orange dot - Atlantic Forests (g, h, i) and violet dot - Amazonian forest  
298 (j, k, l). The blue lines represent linear regression and the gray shadow represents standard deviation in  
299 random networks. The black bars indicate the frequency distribution of the random networks: right y axis -  
300 nestedness frequency, upper x axis - frequency of the number of parasites (details: Appendix S10 in  
301 Supporting Information).

302  
303 **Fig. 2** Connectance values according to the number of parasite species before standardization. The black  
304 dots indicate the connectance value of random networks for three theoretical models. Grey dot - Pantanal  
305 (a, b, c), green dot - Chaco (d, e, f), orange dot - Atlantic Forests (g, h, i) and violet dot - Amazonian forest  
306 (j, k, l). The blue lines represent linear regression and the gray shadow represents standard deviation over  
307 the random networks. The black bars indicate the frequency distribution of the random networks: right y  
308 axis - connectance frequency, upper x axis - frequency of the number of parasites (details: Appendix S10  
309 in Supporting Information).

310

311 **Fig. 3** Modularity values according to the number of parasite species before standardization. The black  
 312 dots indicate the modularity value of random networks for three theoretical models. Grey dot - Pantanal (a,  
 313 b, c), green dot - Chaco (d, e, f), orange dot - Atlantic Forests (g, h, i) and violet dot - Amazonian forest (j,  
 314 k, l). The blue lines represent linear regression and the gray shadow represents standard deviation over  
 315 the random networks. The black bars indicate the frequency distribution of the random networks: right y  
 316 axis - modularity frequency, upper x axis - frequency of the number of parasites (details: Appendix S10 in  
 317 Supporting Information).

318  
 319 **Host body size and phylogeny models usually better describe the observed**  
 320 **network than neutral models**

321 The distance (D) between random networks and their respective observed network were  
 322 significantly different among the models (Table 1). The body size model that better  
 323 resembled the nestedness pattern was observed in the Pantanal and Chaco, while in the  
 324 Atlantic Rainforest, it was the phylogeny model. The connectance values in the Atlantic  
 325 Rainforest were better resembled by the neutral model, while in the Pantanal and Chaco  
 326 were better resembled by the body size and phylogeny models, respectively. The  
 327 modularity was better resembled by the phylogeny model in the Pantanal and Chaco  
 328 networks, while modularity in the Atlantic Rainforest was best explained by the body size  
 329 model (Table 1). Such results, with the exception for connectance in the Atlantic  
 330 Rainforest, show that the body size and phylogeny of the hosts resemble better the  
 331 network structure than neutral model.

332  
 333 **Table 1.** Analysis of variance (statistical significance test  $F_{2-2997}$ ), Tukey Test between neutral models (N),  
 334 phylogeny (P) and body size (BS) for each metric and environment (observed network).

| Metric     | Environment | ANOVA        | Tukey HSD         |    | <D>  |
|------------|-------------|--------------|-------------------|----|------|
|            |             | $F_{2-2997}$ | Theoretical Model |    |      |
| Nestedness | Pantanal    | 9.10*        | P - N             | BS | 5.85 |
|            |             |              | BS - N*           | P  | 5.94 |
|            |             |              | BS - P            | N  | 6.04 |

|             |                     |          |          |    |        |
|-------------|---------------------|----------|----------|----|--------|
|             |                     |          | P - N*   | BS | 3.21   |
|             | Chaco               | 396.70*  | BS - N*  | N  | 4.07   |
|             |                     |          | BS - P*  | P  | 4.43   |
|             | Atlantic Rainforest | 31.34*   | P - N*   | P  | 1.27   |
|             |                     |          | BS - N*  | BS | 1.49   |
|             |                     |          | BS - P * | N  | 1.62   |
|             | Pantanal            | 2166.00* | P - N*   | BS | 12.56  |
|             |                     |          | BS - N*  | P  | 13.58  |
|             |                     |          | BS - P * | N  | 15.46  |
| Connectance | Chaco               | 251.70*  | P - N*   | P  | 4.86   |
|             |                     |          | BS - N   | BS | 5.68   |
|             |                     |          | BS - P * | N  | 5.77   |
|             | Atlantic Rainforest | 220.60*  | P - N*   | N  | 3.68   |
|             |                     |          | BS - N*  | P  | 4.17   |
|             |                     |          | BS - P * | BS | 4.62   |
| Modularity  | Pantanal            | 166.50*  | P - N*   | P  | - 5.15 |
|             |                     |          | BS - N*  | BS | - 5.33 |
|             |                     |          | BS - P * | N  | - 5.93 |
|             | Chaco               | 140.50*  | P - N*   | P  | - 3.70 |
|             |                     |          | BS - N*  | S  | - 4.21 |
|             |                     |          | BS - P * | N  | - 4.43 |
|             | Atlantic Rainforest | 59.74*   | P - N*   | BS | - 1.34 |
|             |                     |          | BS - N*  | P  | - 1.68 |
|             |                     |          | BS - P * | N  | - 1.81 |

The right column of "Theoretical Model" is ordered according to the model that better describes the observed network for a given metric, followed by the average distance ( $\langle D \rangle$ ) between the observed network and the random networks. \* = significant difference  $<0.01$ .

335

336

337 **The theoretical models describe environments without flood pulse better**  
 338 **than the flood pulse environments**

339 The resemblance of the network metrics from randomly sampled networks to observed  
 340 networks environments with and without flooding for each metric presented different  
 341 distances (Table 2). All metrics pointed network structure of the Pantanal as the furthest  
 342 from the network structure of the theoretical models (statistics for support Table 2),  
 343 followed by the Chaco and the Atlantic Rainforest. This shows that the environment  
 344 without flood pulse is better described by the proposed models than the flood pulse  
 345 environments. All theoretical models pointed that Pantanal network is the most nested,

346 connected and less modular one followed by Chaco and Atlantic Rainforest (see the  
 347 statistics for support test for each metric between random networks of the models and  
 348 observed network - average distance value,  $\langle D \rangle$ , in Table 2).

349  
 350 **Table 2.** Analysis of variance (statistical significance test  $F_{2-2997}$ ), Tukey Test between neutral (N),  
 351 phylogeny (P) and body size (BS) theoretical models, for each metric and environment.

| Metric        | Model | ANOVA<br>$F_{2-2997}$ | Tukey HSD<br>Environment         | Environment         | $\langle D \rangle$ |
|---------------|-------|-----------------------|----------------------------------|---------------------|---------------------|
| Nestedness    | N     | 4923*                 | Atlantic Rainforest - Chaco*     | Pantanal            | 6.04                |
|               |       |                       | Pantanal - Chaco*                | Chaco               | 4.07                |
|               |       |                       | Pantanal - Atlantic Rainforest * | Atlantic Rainforest | 1.61                |
|               | P     | 5704*                 | Atlantic Rainforest - Chaco*     | Pantanal            | 5.94                |
|               |       |                       | Pantanal - Chaco*                | Chaco               | 4.43                |
|               |       |                       | Pantanal - Atlantic Rainforest*  | Atlantic Rainforest | 1.26                |
|               | BS    | 4840*                 | Atlantic Rainforest - Chaco*     | Pantanal            | 5.85                |
|               |       |                       | Pantanal - Chaco*                | Chaco               | 3.21                |
|               |       |                       | Pantanal - Atlantic Rainforest*  | Atlantic Rainforest | 1.48                |
| Connectedness | N     | 39508*                | Atlantic Rainforest - Chaco*     | Pantanal            | 15.46               |
|               |       |                       | Pantanal - Chaco*                | Chaco               | 5.77                |
|               |       |                       | Pantanal - Atlantic Rainforest*  | Atlantic Rainforest | 3.68                |
|               | P     | 27554**               | Atlantic Rainforest - Chaco*     | Pantanal            | 13.58               |
|               |       |                       | Pantanal - Chaco*                | Chaco               | 4.86                |
|               |       |                       | Pantanal - Atlantic Rainforest*  | Atlantic Rainforest | 4.17                |
|               | BS    | 18577*                | Atlantic Rainforest - Chaco*     | Pantanal            | 12.56               |
|               |       |                       | Pantanal - Chaco*                | Chaco               | 5.68                |
|               |       |                       | Pantanal - Atlantic Rainforest*  | Atlantic Rainforest | 4.62                |
| Modularity    | N     | 39508*                | Atlantic Rainforest- Chaco*      | Pantanal            | -5.93               |
|               |       |                       | Pantanal - Chaco*                | Chaco               | -4.53               |
|               |       |                       | Pantanal - Atlantic Rainforest*  | Atlantic Rainforest | -1.81               |
|               | P     | 27554*                | Atlantic Rainforest - Chaco*     | Pantanal            | -5.15               |
|               |       |                       | Pantanal - Chaco*                | Chaco               | -3.79               |
|               |       |                       | Pantanal - Atlantic Rainforest * | Atlantic Rainforest | -1.68               |
|               | BS    | 18577*                | Atlantic Rainforest - Chaco*     | Pantanal            | -5.33               |
|               |       |                       | Pantanal - Chaco*                | Chaco               | -4.30               |
|               |       |                       | Pantanal - Atlantic Rainforest*  | Atlantic Rainforest | -1.34               |

The fourth column is ordered according to the environment with the most distance between the observed network and random networks, followed by the average distance ( $\langle D \rangle$ ) between the observed network and the random networks. \*=significant difference  $<0.01$ .

352

## 353 Discussion

354 The method we developed to infer how the structure of anuran-endoparasite interaction  
355 networks under different conditions of encounter opportunities could be described by  
356 theoretical models based on neutral, host phylogeny and host body filters. We found that  
357 the theoretical models described the network without flood pulse - i.e low ecological  
358 opportunity for interaction (Atlantic Rainforest) – better than the networks with cyclic  
359 flood pulse (Pantanal and Chaco). In addition, the networks of the three environments  
360 were best described by the theoretical models with phylogeny or host body size filters  
361 rather than the neutral filter. This result suggests that, in fact, the increased ecological  
362 opportunity for encounters provided by the environment increases connectivity through  
363 the incorporation of new host species in the repertoire of the parasites.

364 The topology patterns observed in the communities reflect the mechanisms that  
365 structure their respective networks. Some studies suggest randomness as an underlying  
366 mechanism for explaining the structure of parasitic communities [44,62]. However, the  
367 metrics we tested in our study did not indicate the neutral model as the main structuring  
368 mechanism for network topology, except for the connectance of the network in the  
369 Atlantic Rainforest. The interactions of the Atlantic Rainforest can be the result of  
370 random neutral encounters between individuals, whose probability is mediated by the  
371 relative abundances of the populations involved and by compatibility in the case of  
372 parasites.

373 In parasitic communities, the evolutionary history of the host acts as one of the  
374 determinants of the community structure [19,67]. Phylogenetic relationships function as  
375 a good proxy for describing ecological differences between hosts and host groups. This  
376 may indicate that these attributes are phylogenetically conserved, modulating  
377 interspecific barriers for parasite colonization among hosts [19,36], and outlining current  
378 interactions [26,64].



379 Many life-history traits are positively correlated with body size and therefore may  
380 have affected the structure and dynamics of ecological networks at multiple scales of  
381 biological organization, from the individual to the ecosystem [20,60,66,77]. Currently, the  
382 major challenge is to develop a body of theory that can explore the implications of body  
383 size on the structure and functioning of the host-parasite networks.

384 The metrics of the Atlantic Rainforest networks were more similar to the theoretical  
385 models than the Pantanal and Chaco networks (Fig. 1, 2, 3 and Table 2). These points  
386 to other potential factor(s), besides phylogeny and size, acting on the structure of the  
387 Pantanal and Chaco networks. Unlike the Atlantic Rainforest, the Pantanal and Chaco  
388 are environments marked by large annual floods. As we suggested, the presence of  
389 these floods promotes greater contact between aquatic and semi-aquatic species, thus  
390 increasing the ecological opportunity for the establishment of new host-parasite  
391 associations [2,4]. The encounters can lead to new associations by ecological fitting, i.e.  
392 the ability of organisms to adapt quickly to new resources due to their phenotypic  
393 flexibility, without genetic novelties [3,7,38].

394 Moreover, species may expand habitat use in response to the availability of new  
395 resources [49,78], which would be associated with the encounter of different hosts in this  
396 study. Some examples of habitat expansion (colonization and adaptation to new  
397 resources or other new selective ecological adjustment scenarios) arise directly from the  
398 events associated with the ecological opportunity [51]. Cyclical expansion of host-  
399 parasitic communities in the ecosystems subjected to annual flood pulses favors  
400 seasonal contact of infectious forms of parasites with hosts. The colonization of new  
401 host species should in fact generate more connected, more nested, and less modular  
402 networks (since modules are broken due to the new connections promoted by the  
403 environment - Fig. 3, a-f). These events increase the repertoire of the parasite, and may

404 represent the beginning of speciation processes, or, they could maintain its repertoire of  
405 host as well as postulated by “Oscillation hypothesis” [10,37,56]. This hypothesis  
406 consists largely of micro and macroevolutionary aspects. The microevolutionary part  
407 deals with how novel hosts are incorporated during host expansions and, as a  
408 consequence, pathogenic lineages can diversify in resource use. The second part is  
409 largely macroevolutionary and foresees that these episodes of increased host use  
410 should lead to elevated rates of diversification. The particularities of the  
411 microevolutionary part affect the specific patterns expected at the macroevolutionary  
412 level. In this context, over the course of evolutionary time, true generalist species may  
413 become specialists, and vice versa [4,37,56].

414 In environments without flood pulse, such as the Atlantic Rainforest, the host-  
415 parasite interaction may be restricted by the low dispersion of species among aquatic  
416 environments, since for many semi-aquatic and aquatic species, the forest environments  
417 may represent ecological barriers. As contact is the main route of parasite transmission  
418 (expected for endoparasites with heteroxenous and monoxenic cycle), the structure of  
419 the Atlantic Rainforest network is very similar to the structure of random networks, since  
420 hosts share fewer parasites. Our results suggest that the ecological opportunity for  
421 interaction may play an important role in determining the structure of interaction  
422 networks and the evolutionary dynamics of host-parasite associations. These results  
423 create new perspectives for studies on parasitic community assemblages, particularly as  
424 few studies relate the connectivity of host communities to the opportunity for parasitic  
425 dispersion. This may, in fact, increase our understanding on the influence of the  
426 dynamics of the physical environment on the structure of host-parasites interactions.

427 From an epidemiological perspective, changes in the composition of parasitic  
428 species or in the frequency of host-parasite interactions are associated with the risks of

429 parasitic invasions and emerging diseases [1,4,11,13,33,39,46,54]. Some examples  
430 come from studies with the introductions of species [35,57]. In birds, for instance, the  
431 occurrence of nematode parasites increases with the ecological opportunity due to  
432 migratory habits and the use of aquatic habitat [47,57]. This results in a change in  
433 community structure and the formation of new species associations through a  
434 combination of mechanisms, such as ecological adaptation and opportunity for  
435 interaction between species [68,69]. In part, the emerging diseases are a result of  
436 processes such as those that occur during the flood pulse, in which climate change,  
437 travel, and global trade generate opportunities for new species associations [57]. We  
438 show that an insight is provided into the dynamics of the incorporation of a new  
439 resource, as an evolutionary factor considered to be responsible for changes in species  
440 composition.

441       Our results may have been influenced by the fact that the host-parasites interaction  
442 database was built from several studies, with different sampling efforts in different  
443 regions. This could have increased the interaction records, and, consequently, increased  
444 the connectance and reduced the modularity of theoretical models. On the other hand,  
445 the interaction database had a larger spatial scale than the local studies in the analyzed  
446 environments, so that the random networks could have selected hosts that did not co-  
447 occur and, therefore, did not share the same species of parasites, resulting in more  
448 modular, but less connected random networks. Even so, the variation in network size  
449 between the simulations is high; there is a risk that methodological artifacts (low sample  
450 effort) may have been affected, especially in the Amazon network. The fact that the  
451 Amazon has a low parasitic richness could be due to the lower sampling effort.  
452 Therefore, we opted for excluding this environment from our analyses. However, even

453 with these factors, all the observed networks had the same tendency; they were all more  
454 connected and less modular than predicted by the models, thus validating our results.

455

## 456 **Acknowledgements**

457 The authors would like to thank the Academic Publishing Advisory Center (Centro de  
458 Assessoria de Publicação Acadêmica, CAPA – [www.capa.ufpr.br](http://www.capa.ufpr.br)) of the Federal  
459 University of Paraná for assistance with English editing. EDB was supported by a Master  
460 degree fellowship from Coordenação de Aperfeiçoamento de Pessoal de Nível Superior  
461 (CAPES).

462

## 463 **Author Contributions**

464 KMC, WAB, SBLA and EDB originally formulated the idea. SBLA and EDB developed the  
465 mathematical models, conducted work and generated data analyses. EDB, SBLA, KMC  
466 and WAB wrote the manuscript.

467

## 468 **Conflict of interest**

469 The authors declare that they have no conflict of interests.

470

## 471 **References**

- 472 1. Adlard RD, Miller TL, Smit NJ. The butterfly effect: parasite diversity,  
473 environment, and emerging disease in aquatic wildlife. *Trends in Parasitology*.  
474 2015;31(4):160-166.
- 475 2. Agosta SJ. On ecological fitting, plant–insect associations, herbivore host shifts,  
476 and host plant selection. *Oikos*. 2006;114(3):556-565.

- 477 3. Agosta SJ, Klemens JA. Ecological fitting by phenotypically flexible genotypes:  
478 implications for species associations, community assembly and evolution.  
479 Ecology Letters. 2008;11(11):1123-1134.
- 480 4. Agosta SJ, Janz N, Brooks DR. How specialists can be generalists: resolving the  
481 “parasite paradox” and implications for emerging infectious disease. Zoologia.  
482 2010;27(2):151-162.
- 483 5. Agostinho AA, Thomaz SM, Minte-Vera CV, Winemiller KO. Biodiversity in the  
484 high Paraná river Floodplain. In: Gopal B, Junk WJ, Davis JA. Biodiversity in  
485 wetlands: assessment, function and conservation, Backhuys Publishers, Leiden;  
486 2000. p. 89-118.
- 487 6. Almeida-Neto M, Guimaraes P, Guimaraes Jr PR, Loyola RD, Ulrich W. A  
488 consistent metric for nestedness analysis in ecological systems: reconciling  
489 concept and measurement. Oikos. 2008;117(8):1227-1239.
- 490 7. Araujo SB, Braga MP, Brooks DR, Agosta SJ, Hoberg EP, von Hartenthal FW,  
491 et al. Understanding host-switching by ecological fitting. Plos One.  
492 2015;10(10):e0139225.
- 493 8. Bascompte J, Jordano, P, Melián CJ, Olesen JM. The nested assembly of plant–  
494 animal mutualistic networks. Proceedings of the National Academy of Sciences.  
495 2003;100(16):9383-9387.
- 496 9. Bozelli RL. Composition of the zooplankton community of Batata and Mussura  
497 lakes and the Trombetas River, State of Pará, Brazil. Amazoniana. 1992;12:239–  
498 261.
- 499 10. Braga MP, Araujo SB, Agosta S, Brooks D, Hoberg E, Nylin S, et al. Host use  
500 dynamics in a heterogeneous fitness landscape generates oscillations in host  
501 range and diversification. Evolution. 2018;72(9):1773-1783.

- 502 11. Brooks DR, Hoberg EP. How will global climate change affect parasite-host  
503 assemblages? *Trends in parasitology*. 2007;23(12):571-574.
- 504 12. Brooks DR, León-Règagnon V, McLennan DA, Zelmer D. Ecological fitting as a  
505 determinant of the community structure of platyhelminth parasites of anurans.  
506 *Ecology*. 2006;87(sp7):S76-S85.
- 507 13. Brooks DR, Hoberg EP, Boeger WA, Gardner SL, Galbreath K, Herczeg D, et al.  
508 Finding them before they find us: informatics, parasites, and environments in  
509 accelerating climate change. *Comparative Parasitology*. 2014;81(2):155-165.
- 510 14. Brooks DR, Hoberg EP, Boeger WA. In the eye of the cyclops: the classic case  
511 of cospeciation and why paradigms are important. *Comparative Parasitology*.  
512 2015;82(1):1-9.
- 513 15. Brooks DR, Hoberg EP, Boeger WA. *The Stockholm paradigm: Climate change  
514 and emerging disease*. 4th ed. University of Chicago Press, 2019.
- 515 16. Bursey CR, Goldberg SR, Parmelee JR. Gastrointestinal helminths of 51  
516 species of anurans from Reserva Cuzco Amazónico, Peru. *Comparative  
517 Parasitology*. 2001;68(1):21-35.
- 518 17. Campiao KM, de Aquino Ribas AC, Morais DH, da Silva RJ, Tavares LER. How  
519 many parasites species a frog might have? Determinants of parasite diversity in  
520 South American anurans. *Plos One*. 2015;10(10):e0140577.
- 521 18. Campião KM, da Silva ICO, Dalazen GT, Paiva F, Tavares LER. Helminth  
522 parasites of 11 anuran species from the Pantanal Wetland, Brazil. *Comparative  
523 parasitology*. 2016;83(1):92-101.
- 524 19. Clark NJ, Clegg SM, Sam K, Goulding W, Koane B, Wells K. Climate, host  
525 phylogeny and the connectivity of host communities govern regional parasite  
526 assembly. *Diversity and Distributions*. 2018;24(1):13-23.

- 527 20. Cohen JE, Jonsson T, Müller CB, Godfray HCJ, Savage VM. Body sizes of  
528 hosts and parasitoids in individual feeding relationships. *Proceedings of the*  
529 *National Academy of Sciences*. 2005;102(3):684-689.
- 530 21. Combes C. *Parasitism: the ecology and evolution of intimate interactions*.  
531 University of Chicago Press, London. 2001.
- 532 22. Core Team. *R: A language and environment for statistical computing*. R  
533 Foundation for Statistical Computing, Vienna, Austria ISBN 3-900051-07-0,  
534 URL <http://www.R-project.org/>. 2018.
- 535 23. Dallas T, Hall RJ, Drake JM. Competition-mediated feedbacks in experimental  
536 multispecies epizootics. *Ecology*. 2016;97(3):661-670.
- 537 24. Dormann CF, Strauss R. A method for detecting modules in quantitative bipartite  
538 networks. *Methods in Ecology and Evolution*. 2014;5(1):90-98.
- 539 25. Dormann CF, Gruber B, Fründ J. Introducing the bipartite package: analysing  
540 ecological networks. *Interaction*. 2008;1:0.2413793.
- 541 26. Dormann CF, Von Riedmatten L, Scherer-Lorenzen M. No consistent effect of  
542 plant species richness on resistance to simulated climate change for above-or  
543 below-ground processes in managed grasslands. *BMC Ecology*. 2017;17(1):23.
- 544 27. Erwin TL. The taxon pulse: a general pattern of lineage radiation and extinction  
545 among carabid beetles. *Taxonomy, phylogeny, and zoogeography of beetles*  
546 *and ants*. 1985;437-472.
- 547 28. Fecchio A, Pinheiro R, Felix G, Faria IP, Pinho JB, Lacorte GA, et al. Host  
548 community similarity and geography shape the diversity and distribution of  
549 haemosporidian parasites in Amazonian birds. *Ecography*. 2018;41(3):505-515.
- 550 29. Frost DR. *Amphibian Species of the World: an Online Reference*. Version 6.0.  
551 American Museum of Natural History, New York, USA. 2018.

- 552 30. González CE and Hamann MI. Checklist of nematode parasites of amphibians  
553 from Argentina. *Zootaxa*. 2015;3980(4):451-76.
- 554 31. Graça RJ, Oda FH, Lima FS, Guerra V, Gambale PG, Takemoto RM. Metazoan  
555 endoparasites of 18 anuran species from the mesophytic semideciduous Atlantic  
556 Forest in southern Brazil. *Journal of Natural History*. 2017;51(13-14):705-729.
- 557 32. Hadfield JD, Krasnov BR, Poulin R, Nakagawa S. A tale of two phylogenies:  
558 comparative analyses of ecological interactions. *The American Naturalist*.  
559 2013;183(2):174-187.
- 560 33. Hoberg EP and Brooks DR. A macroevolutionary mosaic: episodic host-  
561 switching, geographical colonization and diversification in complex host-parasite  
562 systems. *Journal of Biogeography*. 2008;35(9):1533-1550.
- 563 34. Hoberg EP, Brooks DR. Beyond vicariance: integrating taxon pulses, ecological  
564 fitting, and oscillation in evolution and historical biogeography. *The*  
565 *biogeography of host-parasite interactions*. In Morand S, Krasnov BR (eds.) *The*  
566 *biogeography of host-parasite interactions*. Oxford University Press, 2010. p.  
567 7:20.
- 568 35. Hoberg EP and Zarlenga DS. Evolution and biogeography of *Haemonchus*  
569 *contortus*: linking faunal dynamics in space and time. In: Gasser RB and Von  
570 Samson, *Advances in Parasitology. Haemonchus contortus and Haemonchosis*  
571 *- Past, Present and Future Trends*. 2016. P. 1-30.
- 572 36. Huang S, Bininda-Emonds OR, Stephens PR, Gittleman JL, Altizer S.  
573 Phylogenetically related and ecologically similar carnivores harbour similar  
574 parasite assemblages. *Journal of Animal Ecology*. 2014;83(3):671-680.



- 575 37. Janz N, Nylin S, Wahlberg N. Diversity begets diversity: host expansions and  
576 the diversification of plant-feeding insects. *BMC evolutionary biology*.  
577 2006;6(1):4.
- 578 38. Janzen DH. On ecological fitting. *Oikos*. 1985;45:308-310.
- 579 39. Jones KE, Patel NG, Levy MA, Storeygard A, Balk D, Gittleman JL, et al. Global  
580 trends in emerging infectious diseases. *Nature*. 2008;451(7181):990993Kaiser.
- 581 40. Joppa LN and Williams R. Modeling the building blocks of biodiversity. *Plos*  
582 *One*. 2013;8(2):e56277.
- 583 41. Junk WJ, Bayley PB, Sparks RE. The flood pulse concept in river-floodplain  
584 systems. *Canadian special publication of fisheries and aquatic sciences*.  
585 1989;106(1):110-127.
- 586 42. Kamiya T, O'Dwyer K, Nakagawa S, Poulin R. What determines species  
587 richness of parasitic organisms? A meta-analysis across animal, plant and  
588 fungal hosts. *Biological Reviews*. 2014;89(1):123-134.
- 589 43. Krasnov BR, Fortuna MA, Mouillot D, Khokhlova IS, Shenbrot GI, Poulin R.  
590 Phylogenetic signal in module composition and species connectivity in  
591 compartmentalized host-parasite networks. *The American Naturalist*.  
592 2012;179(4):501-511.
- 593 44. Krishna A, Guimaraes Jr PR, Jordano P, Bascompte J. A neutral-niche theory  
594 of nestedness in mutualistic networks. *Oikos*. 2008;117(11):1609-1618.
- 595 45. Lafferty KD, Kuris AM. Trophic strategies, animal diversity and body size.  
596 *Trends in Ecology & Evolution*. 2002;17(11):507-513.
- 597 46. Lafferty KD. The ecology of climate change and infectious diseases. *Ecology*.  
598 2009;90(4):888-900.

- 599 47. Leung TLF and Koprivnikar J. Nematode parasite diversity in birds: the role of  
600 host ecology, life history and migration. *Journal of Animal Ecology*.  
601 2016;85(6):1471–1480.
- 602 48. Locke SA, McLaughlin JD, Marcogliese DJ. Predicting the similarity of parasite  
603 communities in freshwater fishes using the phylogeny, ecology and proximity of  
604 hosts. *Oikos*. 2013;122(1):73-83.
- 605 49. MacArthur RH, Diamond JM, Karr JR. Density compensation in island faunas.  
606 *Ecology*. 1972;53(2):330-342.
- 607 50. Mácová A, Hoblíková A, Hypša V, Stanko M, Martinů J, KvičEROVÁ J. Mysteries  
608 of host switching: Diversification and host specificity in rodent-coccidia  
609 associations. *Molecular phylogenetics and evolution*. 2018;127:179-189.
- 610 51. Malcicka M, Agosta SJ, Harvey JA. Multi level ecological fitting: indirect life  
611 cycles are not a barrier to host switching and invasion. *Global change biology*  
612 2015;21(9):3210-3218.
- 613 52. May RM. *Stability and complexity in model ecosystems*. Princeton University  
614 Press. v. 6. 1974.
- 615 53. Morand S. (Macro-) Evolutionary ecology of parasite diversity: From  
616 determinants of parasite species richness to host diversification. *International  
617 Journal for Parasitology: Parasites and Wildlife*. 2015;4(1):80-87.
- 618 54. Morse SS, Mazet JA, Woolhouse M, Parrish CR, Carroll D, Karesh WB, et al.  
619 Prediction and prevention of the next pandemic zoonosis. *The Lancet*.  
620 2012;380(9857):1956–1965.
- 621 55. Navaud O, Barbacci A, Taylor A, Clarkson JP, Raffaele S. Shifts in  
622 diversification rates and host jump frequencies shaped the diversity of host

- 623 range among Sclerotiniaceae fungal plant pathogens. *Molecular ecology*.  
624 2018;27(5):1309-1323.
- 625 56. Nylin S, Janz N. Butterfly host plant range: an example of plasticity as a  
626 promoter of speciation? *Evolutionary Ecology*. 2009;23(1):137-146.
- 627 57. Nylin S, Agosta S, Bensch S, Boeger WA, Braga MP, Brooks DR, et al.  
628 Embracing colonizations: a new paradigm for species association dynamics.  
629 *Trends in ecology & evolution*. 2018;33(1):4-14.
- 630 58. Olesen JM, Bascompte J, Dupont YL, Jordano P. The modularity of pollination  
631 networks. *Proceedings of the National Academy of Sciences*.  
632 2007;104(50):19891-19896.
- 633 59. Patella L, Brooks DR, Boeger WA. Phylogeny and ecology illuminate the  
634 evolution of associations under the Stockholm Paradigm: *Aglaiogyrodactylus*  
635 spp. (Platyhelminths, Mongenoidea, Gyrodactylidae) and species of Loricariidae  
636 (Actinopterygii, Siluriformes). *Vie et Milieu-Life and Environment*.  
637 2017;67(2):91-102.
- 638 60. Peters RH. *The Ecological Implications of Body-Size*, Cambridge University  
639 Press. 1983.
- 640 61. Poulin R. Species richness of parasite assemblages: evolution and patterns.  
641 *Annual review of Ecology and Systematics*. 1997;28(1):341-358.
- 642 62. Poulin R. Parasites and the neutral theory of biodiversity. *Ecography*.  
643 2004;27(1):119–123.
- 644 63. Ramalho WP, Machado IF, Vieira LJS. Do flood pulses structure amphibian  
645 communities in floodplain environments? *Biotropica*. 2018;50(2):338-345.

- 646 64. Rezende EL, Albert EM, Fortuna MA, Bascompte J. Compartments in a marine  
647 food web associated with phylogeny, body mass, and habitat structure. *Ecology*  
648 *Letters*. 2009;12(8):779-788.
- 649 65. Rigaud T, Perrot-Minnot MJ, Brown MJ. Parasite and host assemblages:  
650 embracing the reality will improve our knowledge of parasite transmission and  
651 virulence. *Proceedings of the Royal Society B: Biological Sciences*.  
652 2010;277(1701):3693-3702.
- 653 66. Savage VM, Gillooly JF, Brown JH, West GB, Charnov EL. Effects of body size  
654 and temperature on population growth. *The American Naturalist*.  
655 2004;163(3):429-441.
- 656 67. Scordato ES and Kardish MR. Prevalence and beta diversity in avian malaria  
657 communities: Host species is a better predictor than geography. *Journal of*  
658 *Animal Ecology*. 2014;83(6):1387-1397.
- 659 68. Stigall AL. When and how do species achieve niche stability over long time  
660 scales? *Ecography*. 2014;37(11):1123-1132.
- 661 69. Stigall AL, Bauer JE, Lam AR, Wright DF. Biotic immigration events, speciation,  
662 and the accumulation of biodiversity in the fossil record. *Global and Planetary*  
663 *Change*. 2017;148:242-257.
- 664 70. Streicker DG, Turmelle AS, Vonhof MJ, Kuzmin IV, McCracken GF, Rupprecht  
665 CE. Host phylogeny constrains cross-species emergence and establishment of  
666 rabies virus in bats. *Science*. 2010;329(5992):676-679.
- 667 71. Thomaz SM, Bini LM, Bozelli RL. Floods increase similarity among aquatic  
668 habitats in river-floodplain systems. *Hydrobiologia*. 2007;579(1):1-13.
- 669 72. Thomaz SM, Roberto MDC, Bini LM. Caracterização limnológica dos ambientes  
670 aquáticos e influência dos níveis fluviométricos. In *A planície de inundação do*

- 671           alto rio Paraná: aspectos físicos, biológicos e socioeconômicos. Maringá:  
672           EDUEM. 1997. p. 73-102.
- 673           73. Wells K, Gibson DI, Clark NJ. Global patterns in helminth host specificity:  
674           phylogenetic and functional diversity of regional host species pools matter.  
675           Ecography. 2019;42(3):416-427.
- 676           74. Wells K, O'Hara RB, Morand S, Lessard JP, Ribas A. The importance of  
677           parasite geography and spillover effects for global patterns of host–parasite  
678           associations in two invasive species. Diversity and Distributions.  
679           2015;21(4):477-486.
- 680           75. Vermeij GJ, Dudley R. Why are there so few evolutionary transitions between  
681           aquatic and terrestrial ecosystems?. Biological Journal of the Linnean Society.  
682           2000;70(4):541-554.
- 683           76. Wolfe ND, Dunavan CP, Diamond J. Origins of major human infectious  
684           diseases. Nature. 2007;447(7142):279.
- 685           77. Woodward G, Ebenman B, Emmerson M, Montoya JM, Olesen JM, Valido A, et  
686           al. Body size in ecological networks. Trends in ecology & evolution.  
687           2005;20(7):402-409.
- 688           78. Wright SJ. Density compensation in island avifaunas. Oecologia.  
689           1980;45(3):385–389.
- 690           79. Zar JH. Biostatistical Analysis, (4th ed.). Prentice-Hall, Upper Saddle River, NJ,  
691           USA. 1999. p. 931.



# Figures

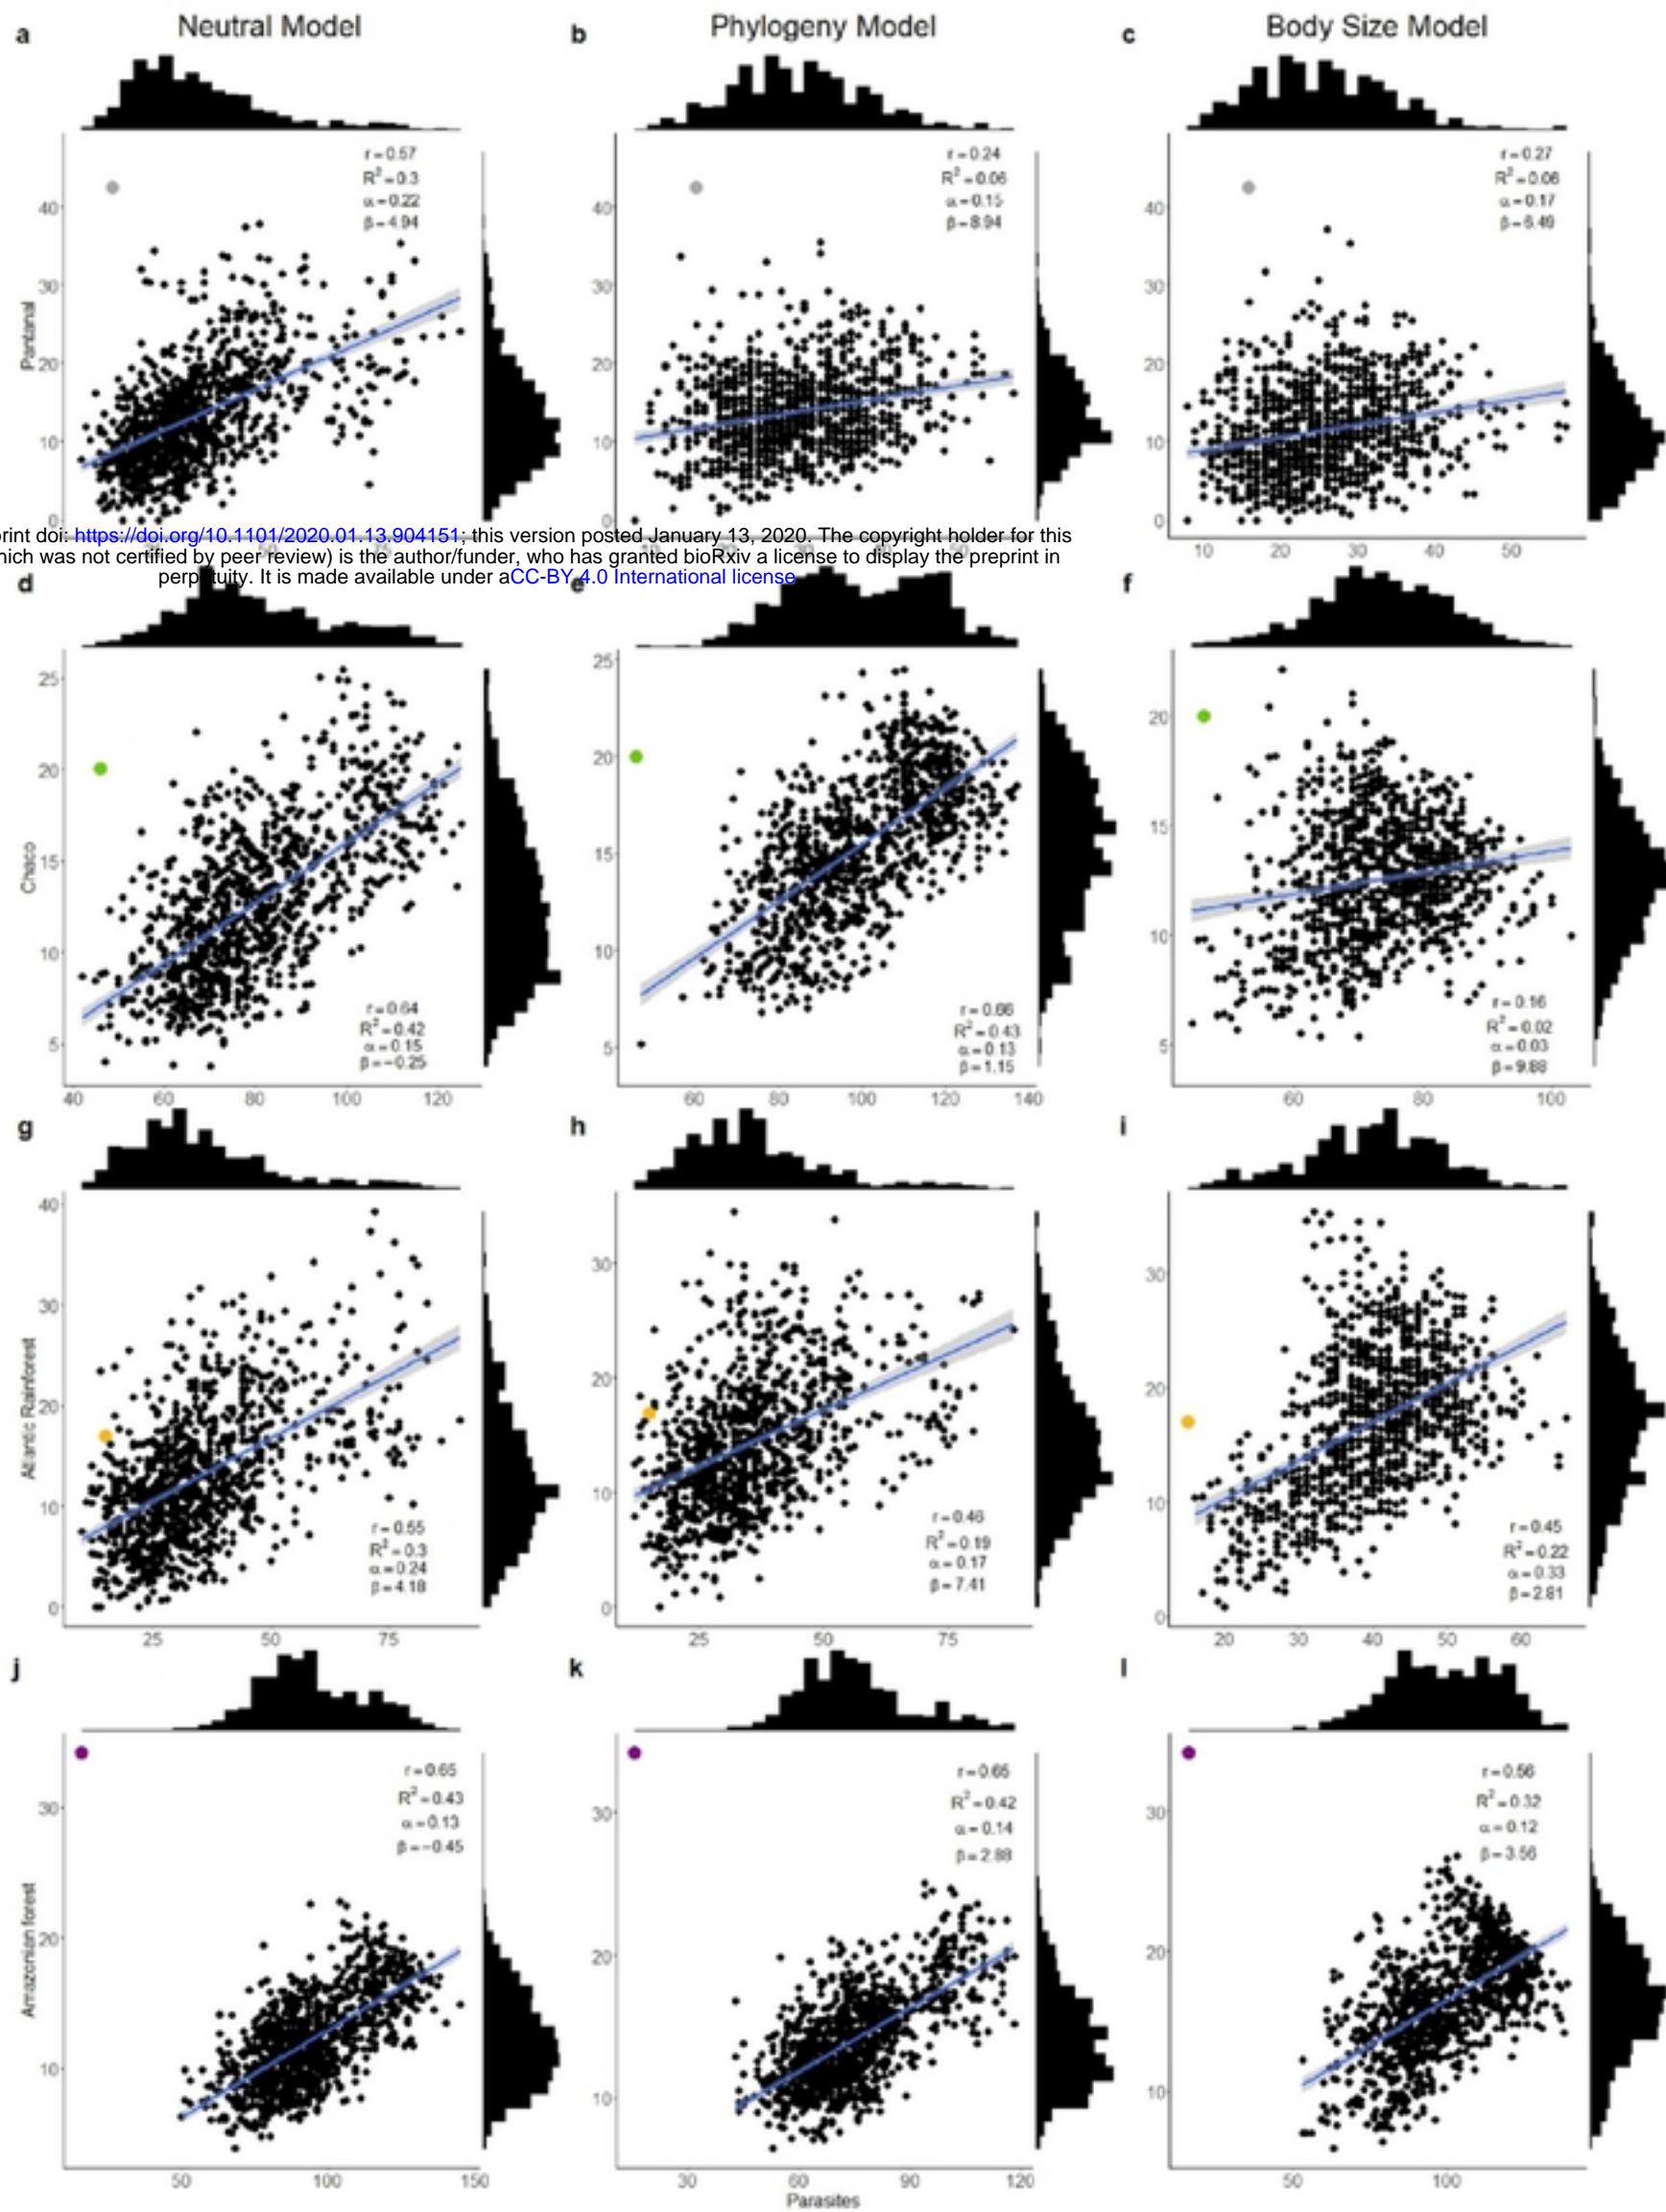

bioRxiv preprint doi: <https://doi.org/10.1101/2020.01.13.904151>; this version posted January 13, 2020. The copyright holder for this preprint (which was not certified by peer review) is the author/funder, who has granted bioRxiv a license to display the preprint in perpetuity. It is made available under aCC-BY 4.0 International license.

Fig. 1

bioRxiv preprint doi: <https://doi.org/10.1101/2020.01.13.904151>; this version posted January 13, 2020. The copyright holder for this preprint (which was not certified by peer review) is the author/funder, who has granted bioRxiv a license to display the preprint in perpetuity. It is made available under aCC-BY 4.0 International license.

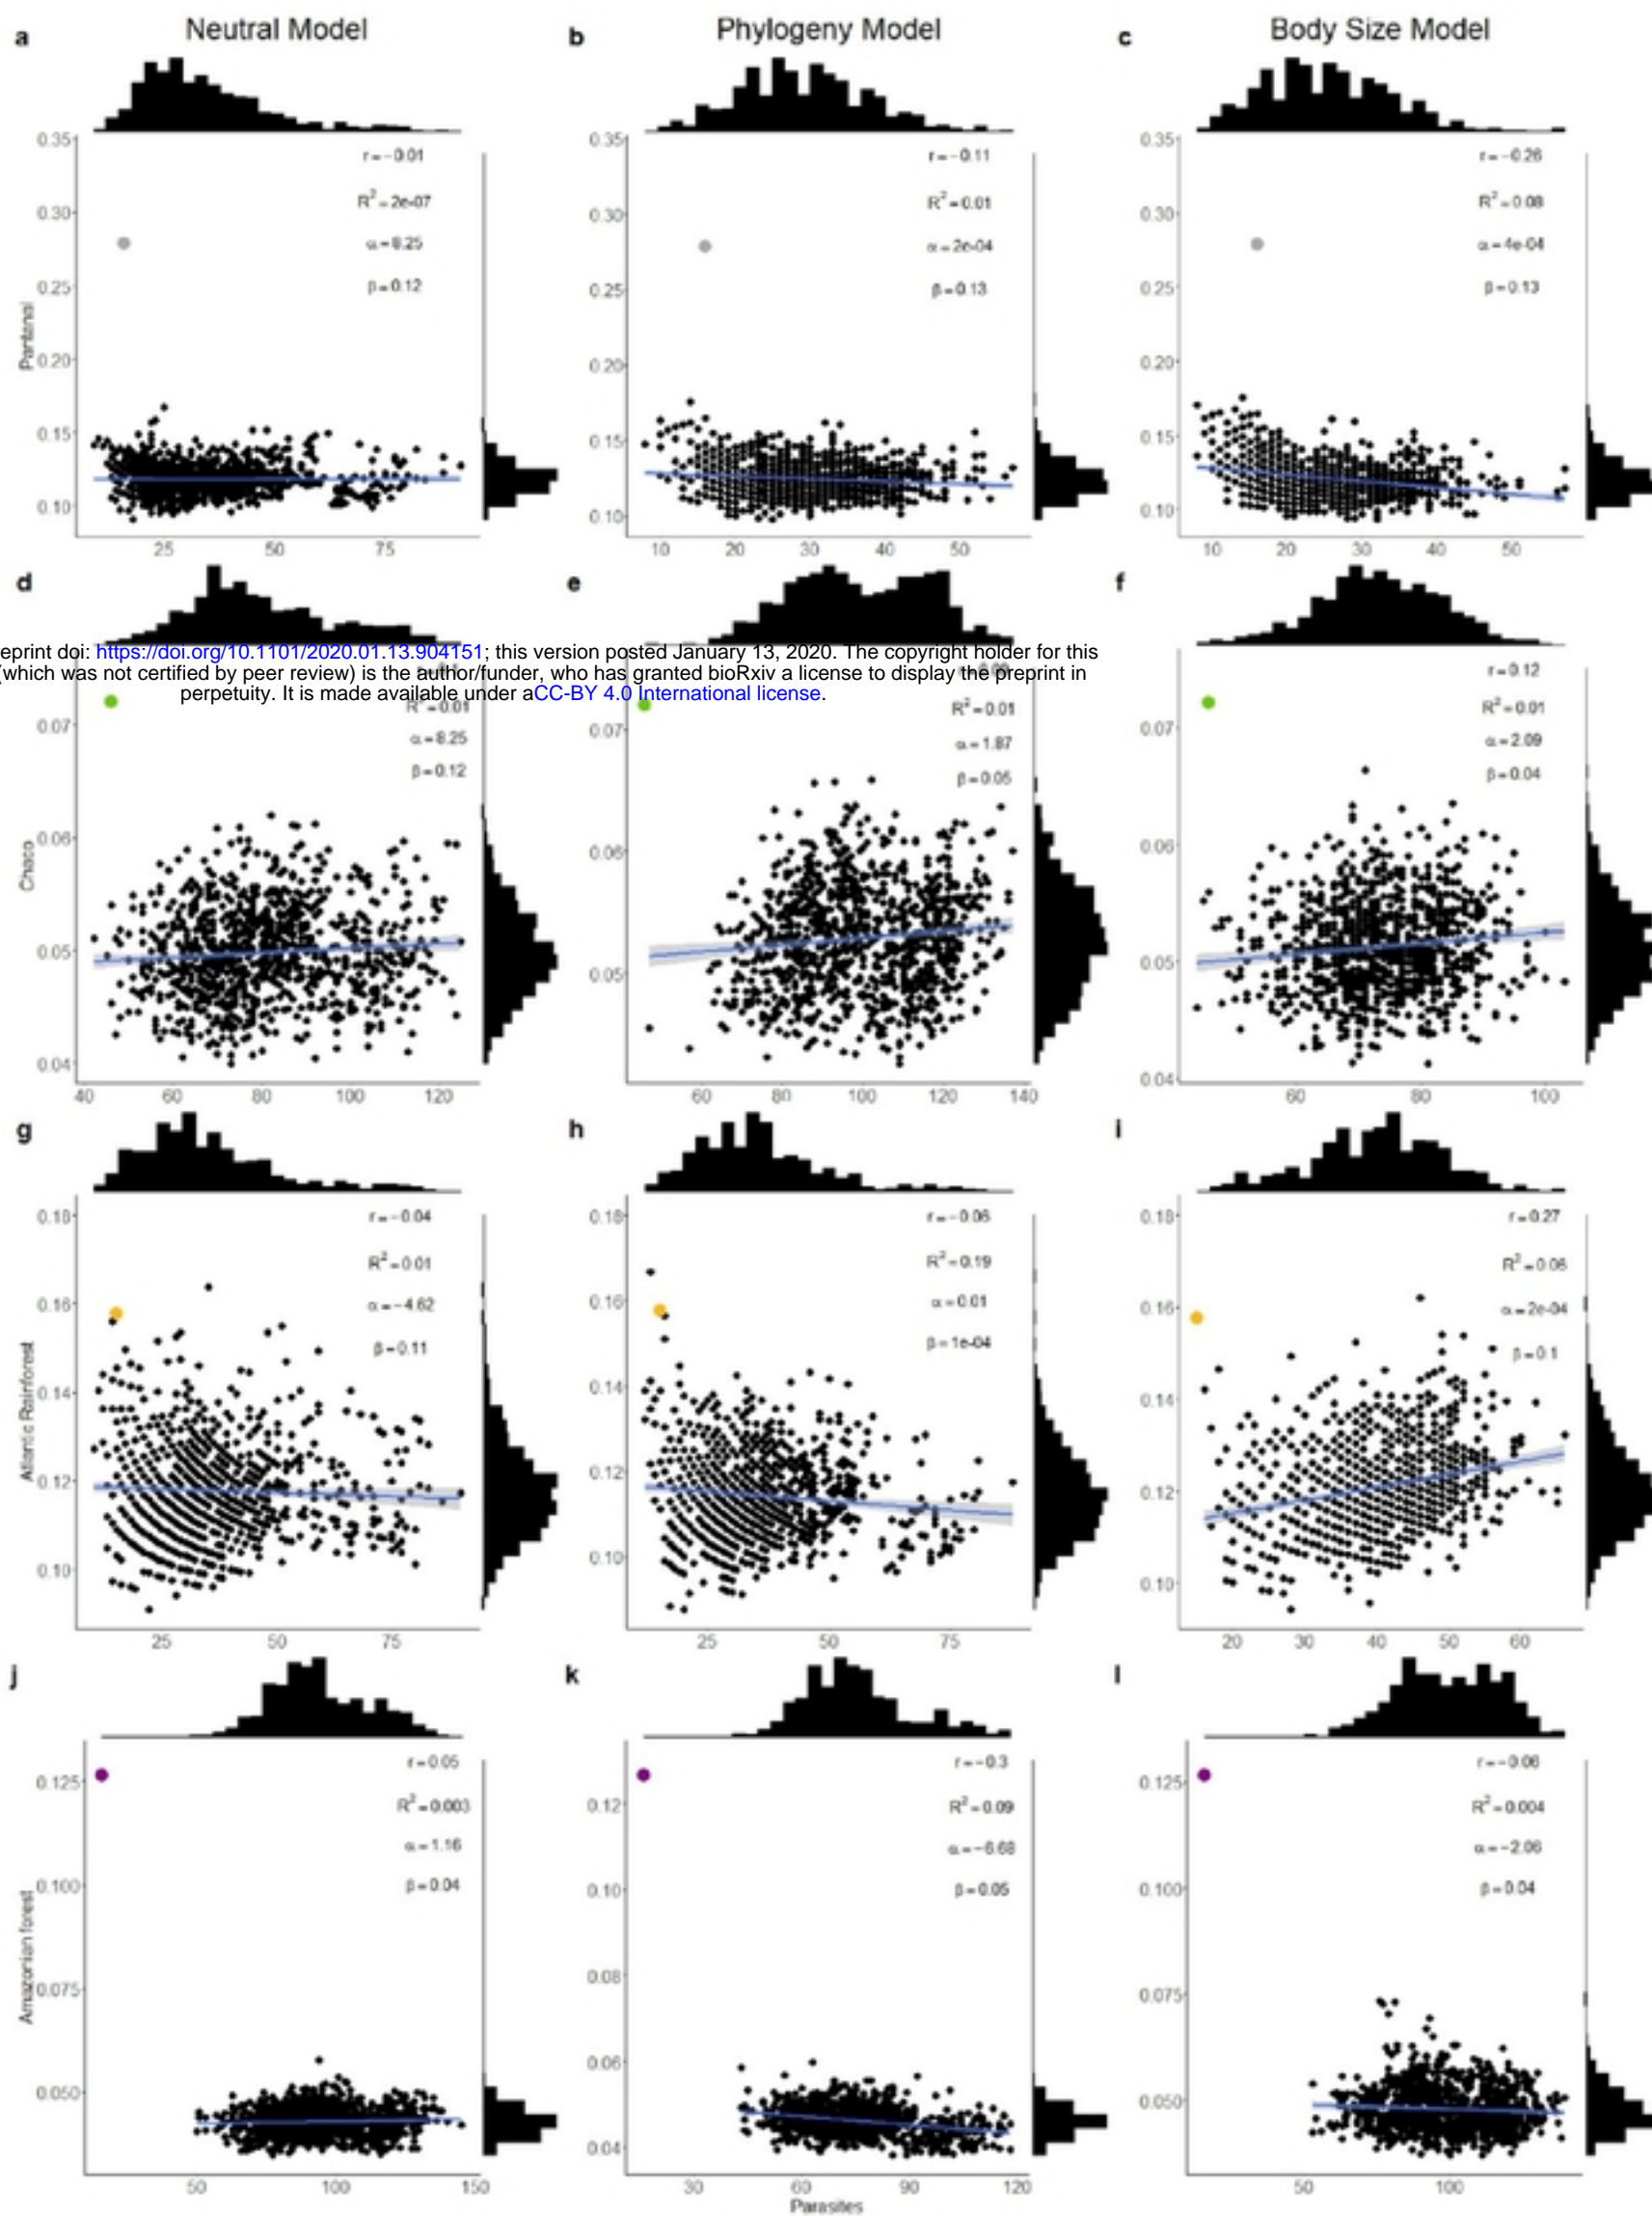

Fig. 2



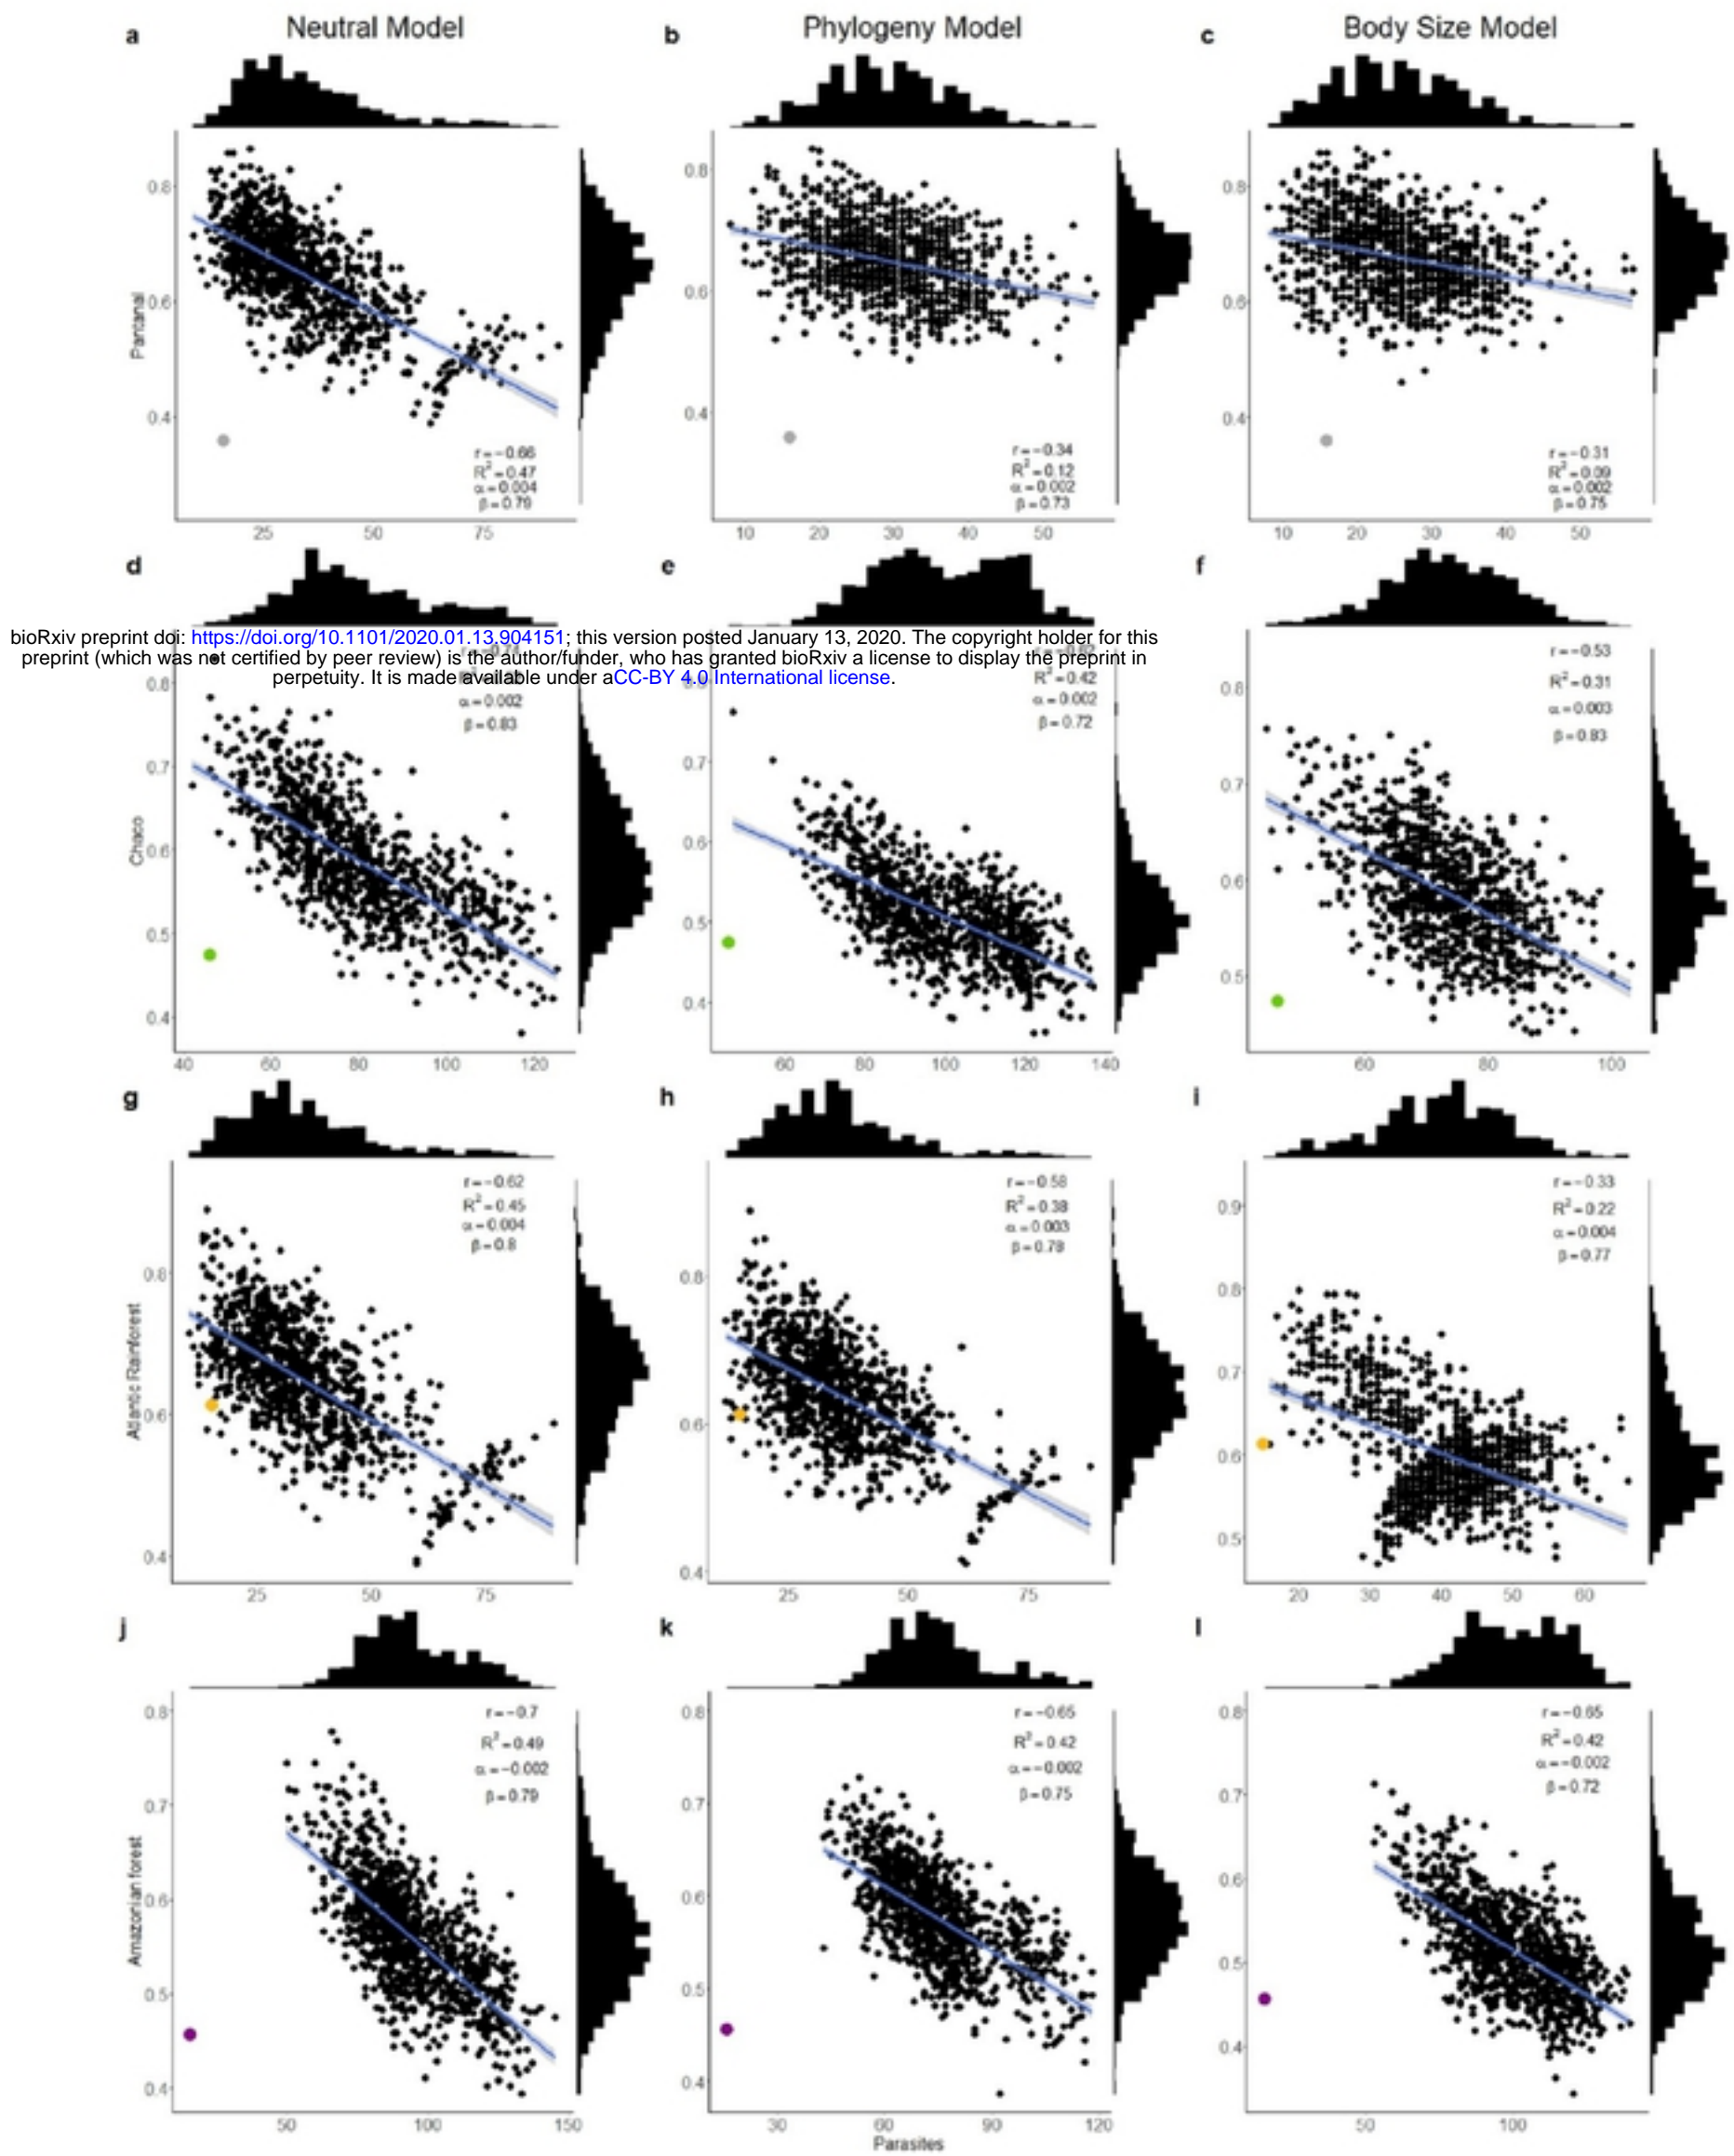

Fig. 3
